# Supplementary material for: Neurotrophin-3 promotes peripheral nerve regeneration by maintaining a repair state of Schwann cells after chronic denervation via the TrkC/ERK/c-Jun pathway
Source: Springer Nature journal article supplement (doi:10.1186/s12967-023-04609-2), 2023-10-17

**Supplemental Figure 1** Establishment of regeneration model of peripheral nerve after chronic denervation

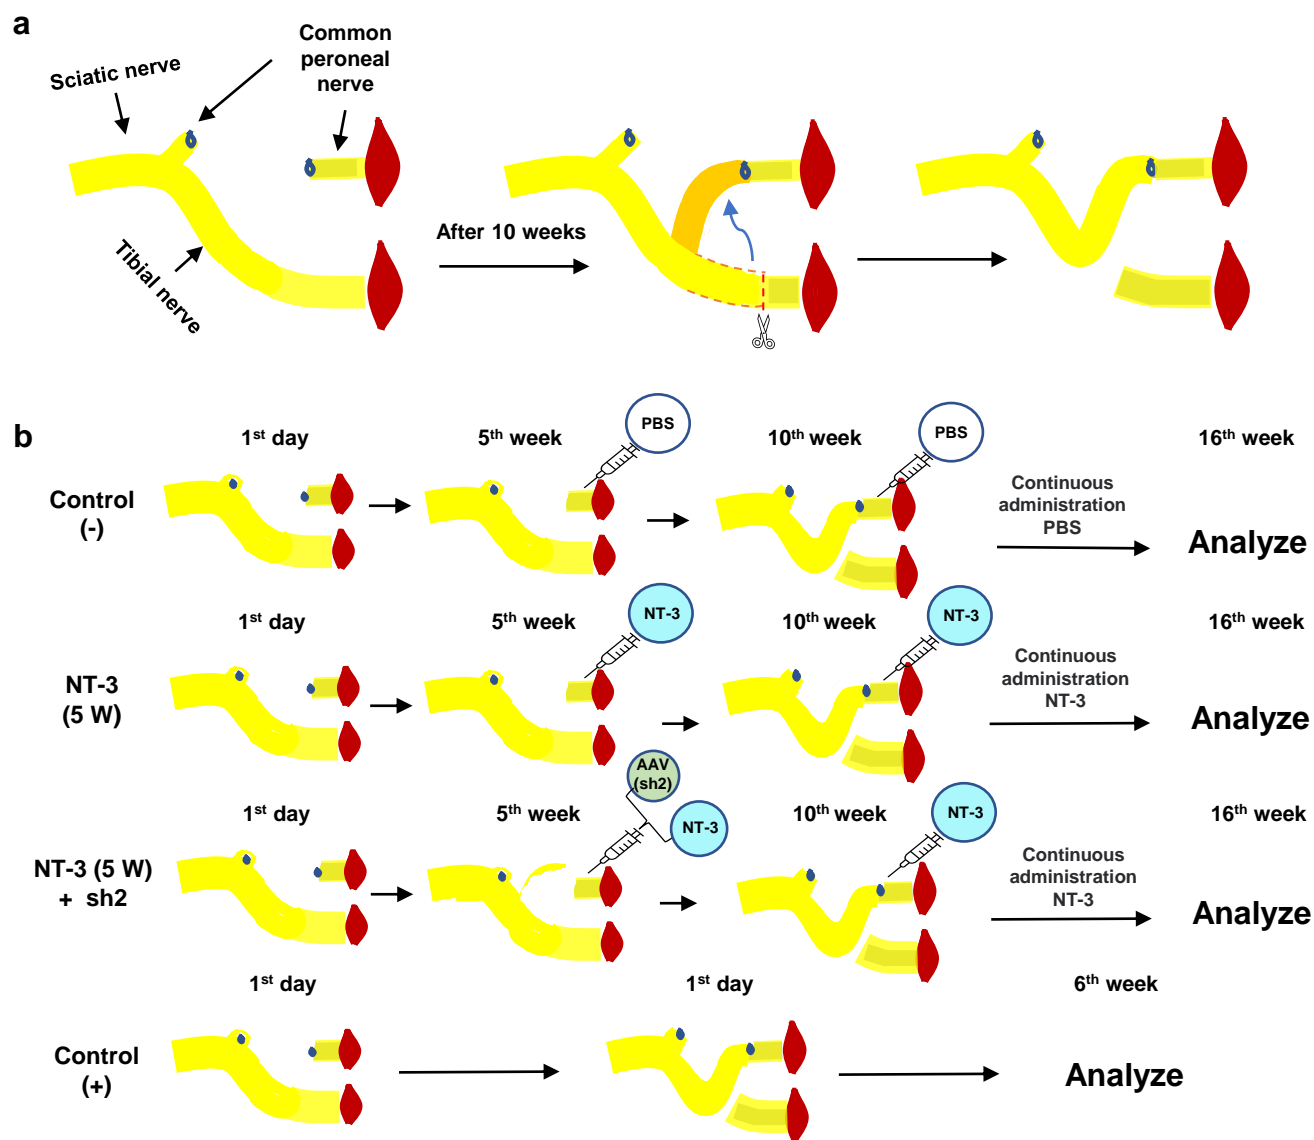

**Supplemental Figure 2** Designing shRNA sequences and constructing AAV vectors.

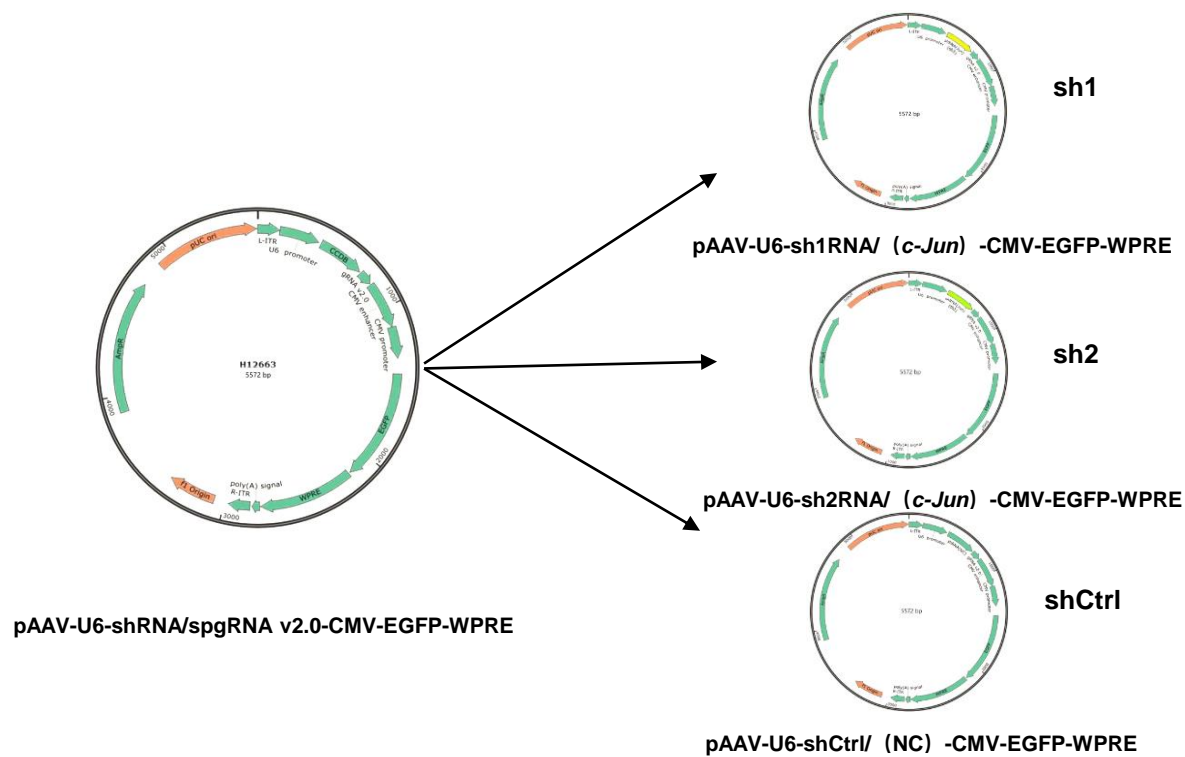

**Supplemental Figure 3** The viability of Schwann cell was measured by CCK-8 kit assay at different timepoints

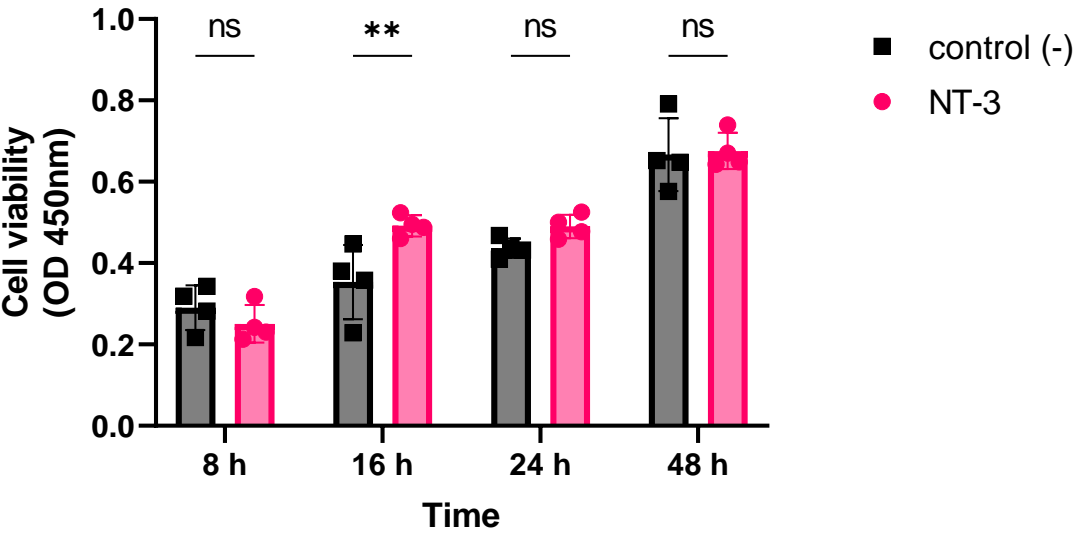

**Supplemental Figure 4** FITC-CTB-labeled motor neurons in anterior horn of the spinal cord

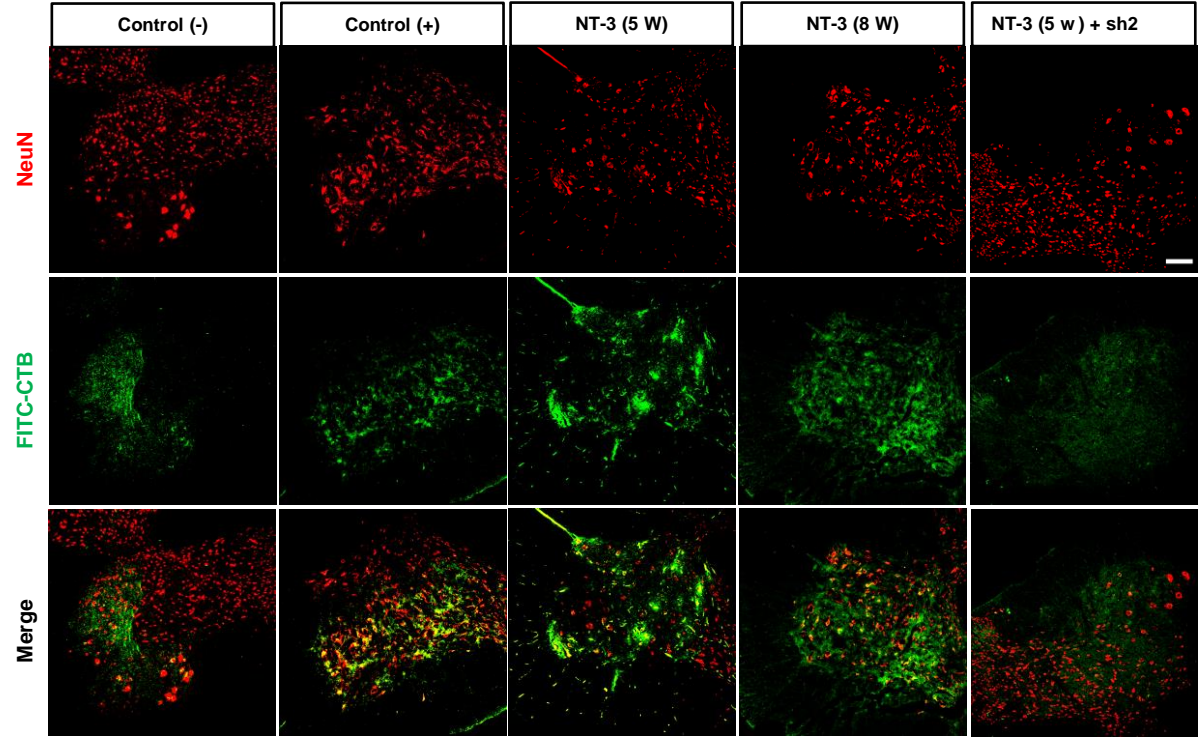

Supplement: MOESM2 [file 12967_2023_4609_MOESM2_ESM.pdf]
